# Supplementary material for: The iPrevent Online Breast Cancer Risk Assessment and Risk Management Tool: Usability and Acceptability Testing
Source: PubMed Central journal article supplement (PMC6334700; doi:10.2196/formative.9935), 2018-11-07
Supplement: formative_v2i2e24_app1.pdf [file formative_v2i2e24_app1.pdf]

*Appendix 1: Breast Cancer Prevention Knowledge Questionnaire*

|                                                                                                                                                                                          |                                                                                                  |  |
|------------------------------------------------------------------------------------------------------------------------------------------------------------------------------------------|--------------------------------------------------------------------------------------------------|--|
| <p><b>The next 16 questions ask you about breast cancer risk factors and screening.</b></p> <p><b>Please indicate for each item whether it is True, False, or if you Don't know.</b></p> |                                                                                                  |  |
| 1. Regular moderate exercise does not reduce your risk of breast cancer                                                                                                                  | <input type="checkbox"/> True <input type="checkbox"/> False <input type="checkbox"/> Don't know |  |
| 2. Maintaining a healthy weight is important for minimising breast cancer risk                                                                                                           | <input type="checkbox"/> True <input type="checkbox"/> False <input type="checkbox"/> Don't know |  |
| 3. You should promptly report any new or unusual changes in your breasts to your GP                                                                                                      | <input type="checkbox"/> True <input type="checkbox"/> False <input type="checkbox"/> Don't know |  |
| 4. Screening mammograms are recommended every two years for women aged 50-74 years                                                                                                       | <input type="checkbox"/> True <input type="checkbox"/> False <input type="checkbox"/> Don't know |  |
| 5. Using hormone replacement therapy (HRT) may decrease your risk of breast cancer                                                                                                       | <input type="checkbox"/> True <input type="checkbox"/> False <input type="checkbox"/> Don't know |  |
| 6. About 1% (10 in 1000) of Australian women will develop breast cancer in their lifetime                                                                                                | <input type="checkbox"/> True <input type="checkbox"/> False <input type="checkbox"/> Don't know |  |
| 7. Consuming alcohol can decrease your risk of breast cancer                                                                                                                             | <input type="checkbox"/> True <input type="checkbox"/> False <input type="checkbox"/> Don't know |  |
| 8. The more children you have, and the earlier you have them, the lower your risk of breast cancer                                                                                       | <input type="checkbox"/> True <input type="checkbox"/> False <input type="checkbox"/> Don't know |  |
| 9. Breast feeding can increase your risk of breast cancer                                                                                                                                | <input type="checkbox"/> True <input type="checkbox"/> False <input type="checkbox"/> Don't know |  |
| 10. Mammograms reduce your risk of developing breast cancer                                                                                                                              | <input type="checkbox"/> True <input type="checkbox"/> False <input type="checkbox"/> Don't know |  |
| 11. Medications such as Tamoxifen may reduce your risk of breast cancer                                                                                                                  | <input type="checkbox"/> True <input type="checkbox"/> False <input type="checkbox"/> Don't know |  |
| 12. Medications such as Tamoxifen are recommended to be taken for 1 year                                                                                                                 | <input type="checkbox"/> True <input type="checkbox"/> False <input type="checkbox"/> Don't know |  |

|                                                                                                                                    |                                                                                                     |
|------------------------------------------------------------------------------------------------------------------------------------|-----------------------------------------------------------------------------------------------------|
| 13. Taking medications such as Tamoxifen is not recommended for women with a history of blood clots or those who smoke             | <input type="checkbox"/> True <input type="checkbox"/> False <input type="checkbox"/><br>Don't know |
| 14. Your breast cancer risk can be slightly increased while you are using a hormonal contraceptive, such as the contraceptive pill | <input type="checkbox"/> True <input type="checkbox"/> False <input type="checkbox"/><br>Don't know |
| 15. Risk-reducing mastectomy means removing as much breast tissue as possible before a cancer develops                             | <input type="checkbox"/> True <input type="checkbox"/> False <input type="checkbox"/><br>Don't know |
| 16. A woman who has her breasts removed will definitely not develop breast cancer                                                  | <input type="checkbox"/> True <input type="checkbox"/> False <input type="checkbox"/><br>Don't know |
