# Supplementary material for: The iPrevent Online Breast Cancer Risk Assessment and Risk Management Tool: Usability and Acceptability Testing
Source: PubMed Central journal article supplement (PMC6334700; doi:10.2196/formative.9935), 2018-11-07
Supplement: formative_v2i2e24_app2.pdf [file formative_v2i2e24_app2.pdf]

*Appendix 2: Results of Pre- and Post-iPrevent® Knowledge Questionnaire*

| <b>Risk Category</b>                                        | <b>No. of women</b> | <b>Pre-iPrevent® mean % questions correct [range]</b> | <b>Post- iPrevent® mean % questions correct [range]</b> |
|-------------------------------------------------------------|---------------------|-------------------------------------------------------|---------------------------------------------------------|
| Average and Moderate < 35yrs <sup>a</sup><br>(11 questions) | 17                  | 69% [45-91%]                                          | 77% [45-91%]                                            |
| Moderate > 35yrs<br>(14 questions)                          | 15                  | 54% [7-86%]                                           | 76% [29-100%]                                           |
| High (16 questions)                                         | 4                   | 89% [75-100%]                                         | 92% [88-94%]                                            |

<sup>a</sup> 5 moderate risk women not shown risk reducing medication information as <35 yrs old hence only assessed on 11 general knowledge questions
